# Supplementary material for: Alleviation of Neuronal Cell Death and Memory Deficit with Chungkookjang Made with Bacillus amyloliquefaciens and Bacillus subtilis Potentially through Promoting Gut–Brain Axis in Artery-Occluded Gerbils
Source: MDPI journal article supplement (doi:10.3390/foods10112697), 2021-11-04
Supplement: s1 [file s1]

Table S1. Nutrient contents in soybeans and chungkookjang fermented with different *Bacillus* spp.

|                                  | Cooked soybeans         | Chungkookjang<br>SRCM 1  | Chungkookjang<br>SRCM 291 |
|----------------------------------|-------------------------|--------------------------|---------------------------|
| Carbohydrates<br>(g/100g)        | 32.3                    | 22.5                     | 19.9                      |
| Proteins (g/100g)                | 15.9                    | 18.2                     | 19.6                      |
| Fats (g/100g)                    | 30.3                    | 36.1                     | 36.6                      |
| Fiber (g/100g)                   | 13.1                    | 14.2                     | 14.8                      |
| Ash (g/100g)                     | 4.40                    | 4.93                     | 5.02                      |
| Genistein (μg/g)                 | 13.2±0.20 <sup>c</sup>  | 85.8±0.3 <sup>b</sup>    | 104.0±5.4 <sup>a</sup>    |
| Daidzein (μg/g)                  | 23.5±0.05 <sup>c</sup>  | 66.4±1.6 <sup>b</sup>    | 79.7±5.9 <sup>a</sup>     |
| Glycitein (μg/g)                 | 16.1±0.38 <sup>a</sup>  | 9.3±0.9 <sup>b</sup>     | 10.2±1.9 <sup>b</sup>     |
| Isoflavonoid<br>aglycones (μg/g) | 52.8±0.7 <sup>c</sup>   | 161.5 ± 2.1 <sup>b</sup> | 193.9±4.6 <sup>a</sup>    |
| Genistin (μg/g)                  | 204.6±20.0 <sup>a</sup> | 46.8±7.8 <sup>b</sup>    | 29.4±6.3 <sup>c</sup>     |
| Daidzin (μg/g)                   | 114.7±8.46 <sup>a</sup> | 40.3±2.3 <sup>b</sup>    | 18.0±1.1 <sup>c</sup>     |
| Glycitin (μg/g)                  | 41.5±0.81 <sup>a</sup>  | 7.5±0.6 <sup>b</sup>     | 7.4±0.9 <sup>b</sup>      |
| Isoflavonoid<br>glycones (μg/g)  | 360.8±2.6 <sup>a</sup>  | 94.6±3.8 <sup>b</sup>    | 54.8±3.1 <sup>c</sup>     |

Values are means ± SD (n=3). <sup>a,b,c</sup> values in the same row with different superscript letters were significantly different by Tukey's test at  $p<0.05$ .
